# Supplementary material
Source: publisher figshare collection journal article supplement (https://acs.figshare.com/ndownloader/files/18043235)
Supplement: Supplementary file 1 [file 18043235]

# **Supporting Information for**

## **Numerical Simulation of CO<sub>2</sub> Huff and Puff Feasibility for Light Oil Reservoirs in the Appalachian Basin: Sensitivity Study and History Match of a CO<sub>2</sub> Pilot Test**

S. Raziperchikolaee, S. Mishra

Battelle Memorial Institute, Columbus, Ohio

**Scope of Document:** 6 Different model realizations, used for studying effect of permeability variations, are shown in Appendix A. Model parameters, schematic, and simulation results of three base cases of history match are presented in Appendix B.

**Appendix A, B**

**9 pages**

## Appendix A

6 Different model realizations, used for studying effect of permeability variations, are shown in this Appendix

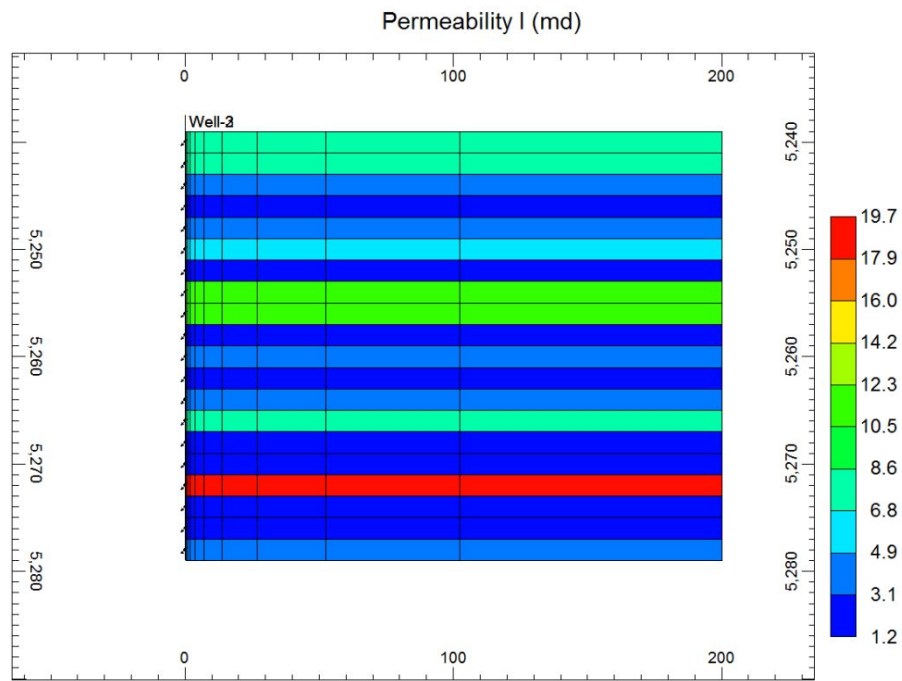

Figure A-1: Realization 1

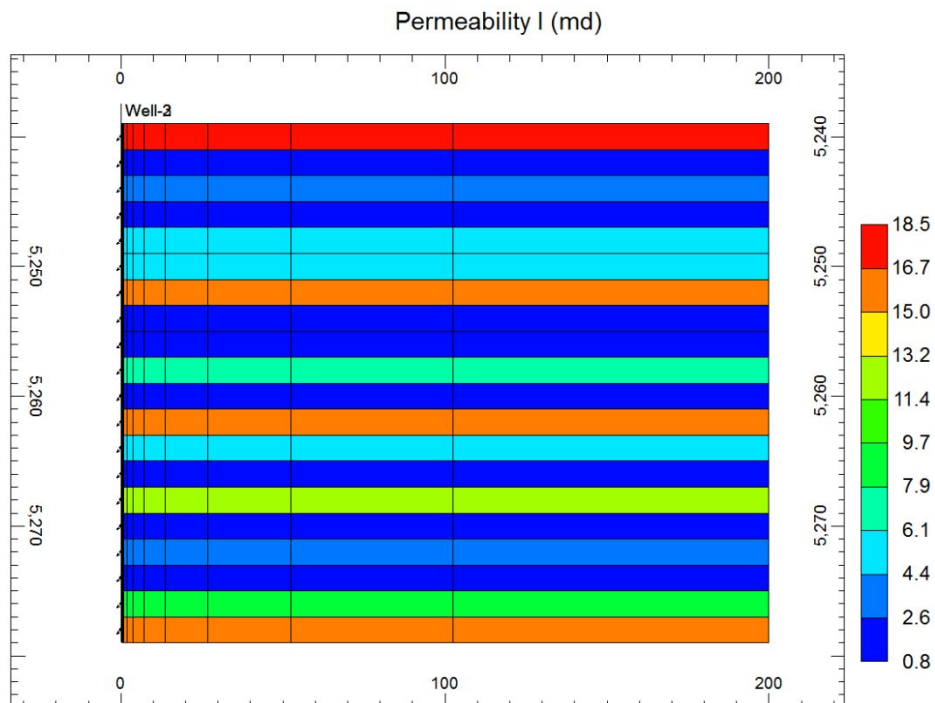

Figure A-2: Realization 2

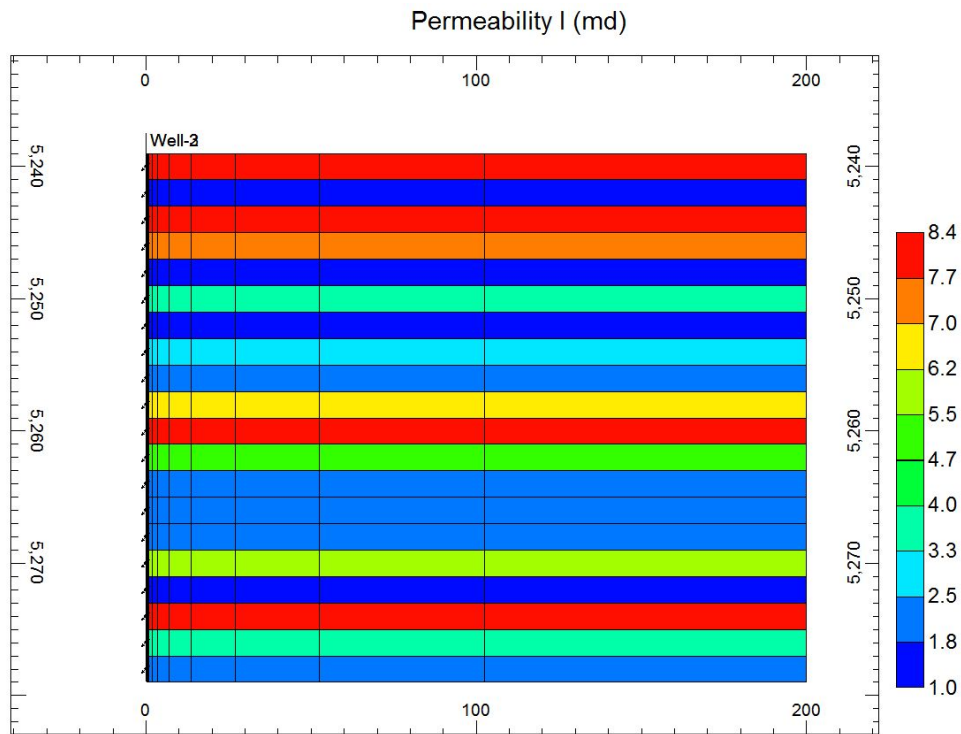

Figure A-3: Realization 3

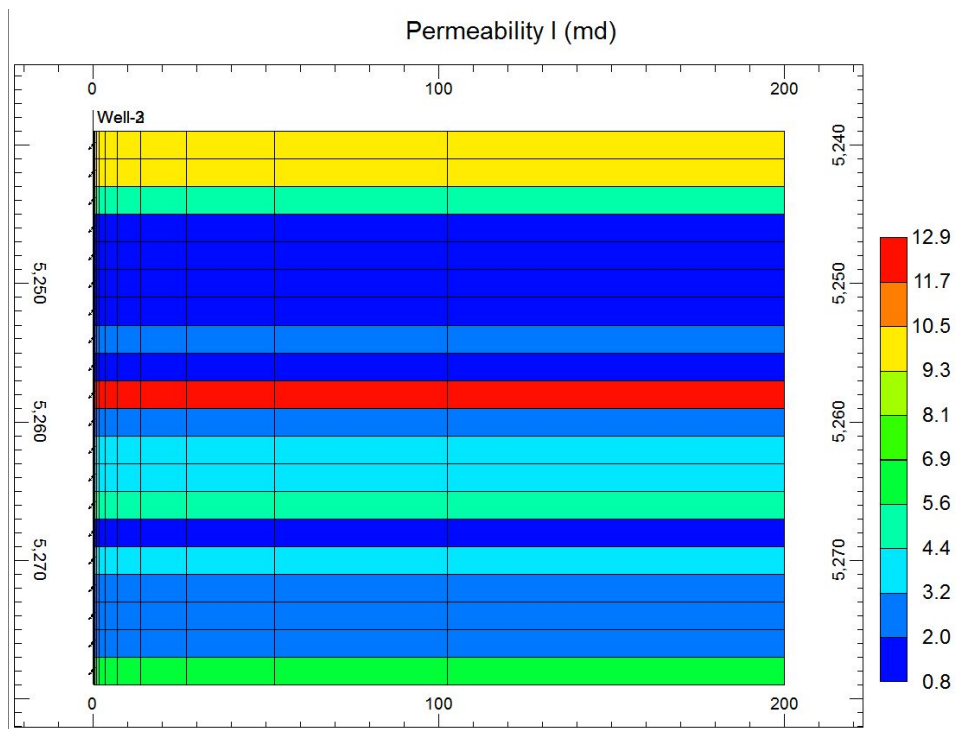

Figure A-4: Realization 4

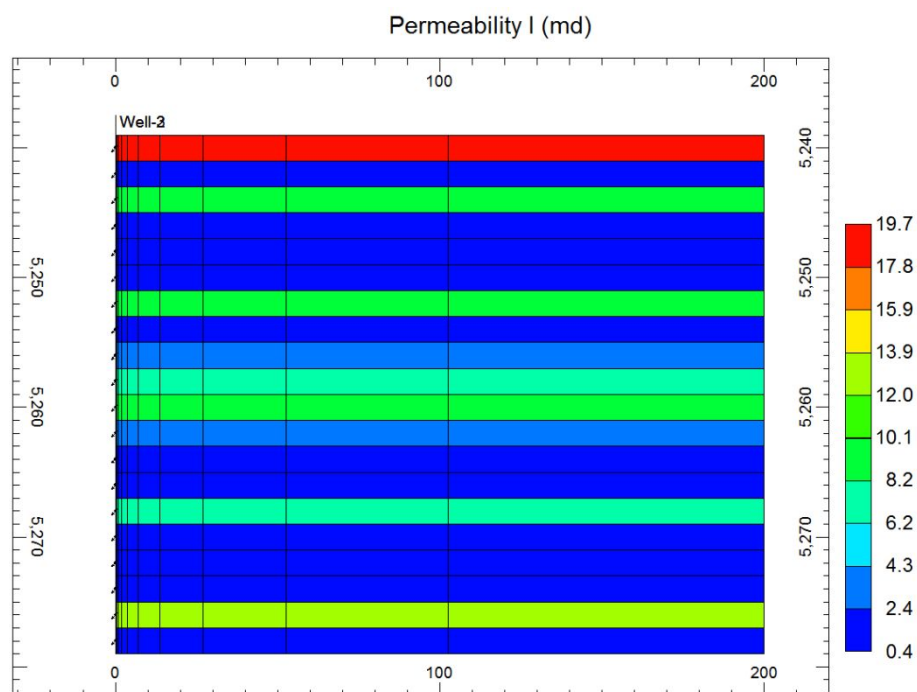

Figure A-5: Realization 5

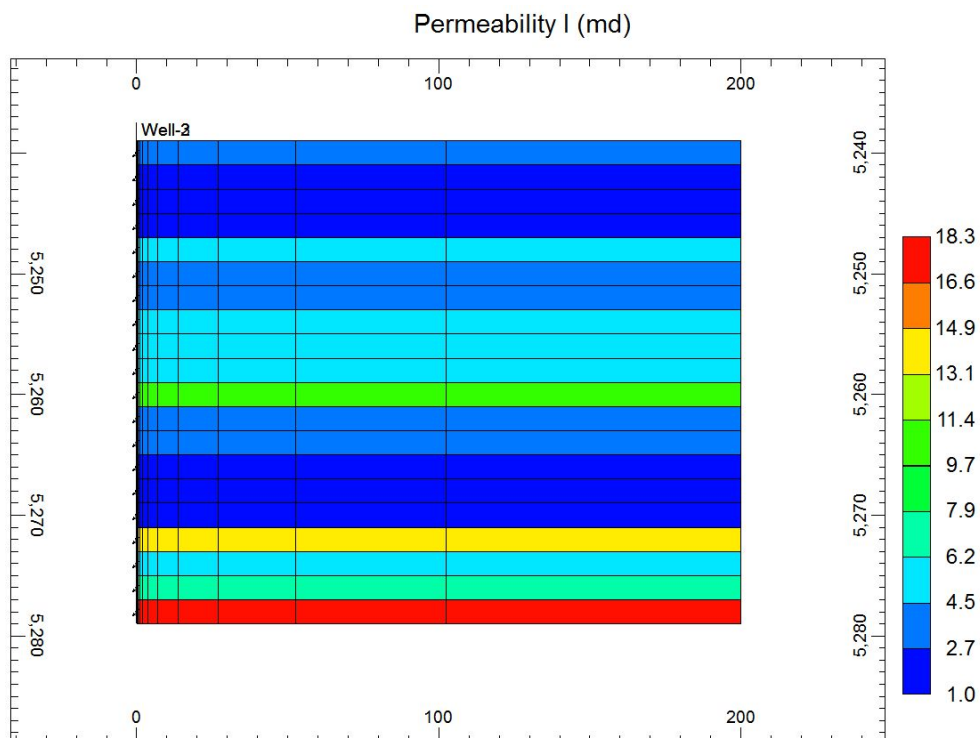

Figure A-6: Realization 6

## Appendix B

Appendix B present model parameters, schematic, and simulation results of three base cases.

Table B-1: shows the data sources, parameters, and other assumptions associated with the 3 different models.

| Model Type                          | Constant permeability                    | Layered Permeability<br>(two value Permeability) | Layered vertically and<br>Laterally Permeability<br>(two value<br>Permeability) |
|-------------------------------------|------------------------------------------|--------------------------------------------------|---------------------------------------------------------------------------------|
| Porosity                            | 6.6%                                     | 6.6%                                             | 6.6%                                                                            |
| Thickness(ft)                       | 111                                      | 111                                              | 111                                                                             |
| Initial Sw                          | 0.3                                      | 0.3                                              | 0.3                                                                             |
| Net Pay Ratio                       | 1                                        | 1                                                | 1                                                                               |
| Reservoir<br>Boundary<br>Radius(ft) | 200                                      | 200                                              | 200                                                                             |
| Perforation Zone<br>(ft)            | 5239 – 5343                              | 5239 – 5343                                      | 5239 – 5343                                                                     |
| Initial Pressure<br>(psi)           | Equal to Pb 1960 psi                     | Equal to Pb 1960 psi                             | Equal to Pb 1960 psi                                                            |
| Permeability (md)                   | 8.5 md                                   | 10 md (High Perm)<br>1 md (Low Perm)             | 12 md (High Perm)<br>1 md (Low Perm)                                            |
| Primary<br>Production<br>Constrain  | Oil Rate Constrain                       | Oil Rate Constrain                               | Oil Rate Constrain                                                              |
| huff and puff<br>constrain (MT)     | CO2 Rate Constrain<br>(Injecting 150 MT) | CO2 Rate Constrain<br>(Injecting 150 MT)         | CO2 Rate Constrain<br>(Injecting 150 MT)                                        |



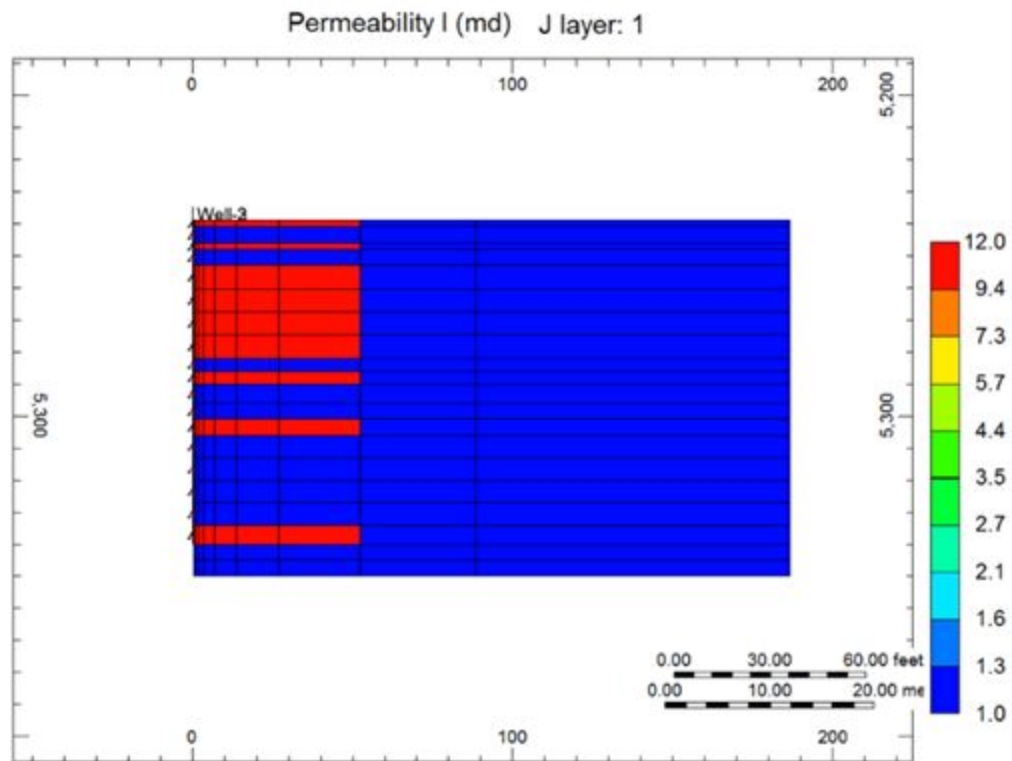

Figure B-1: Model schematics of three basic models

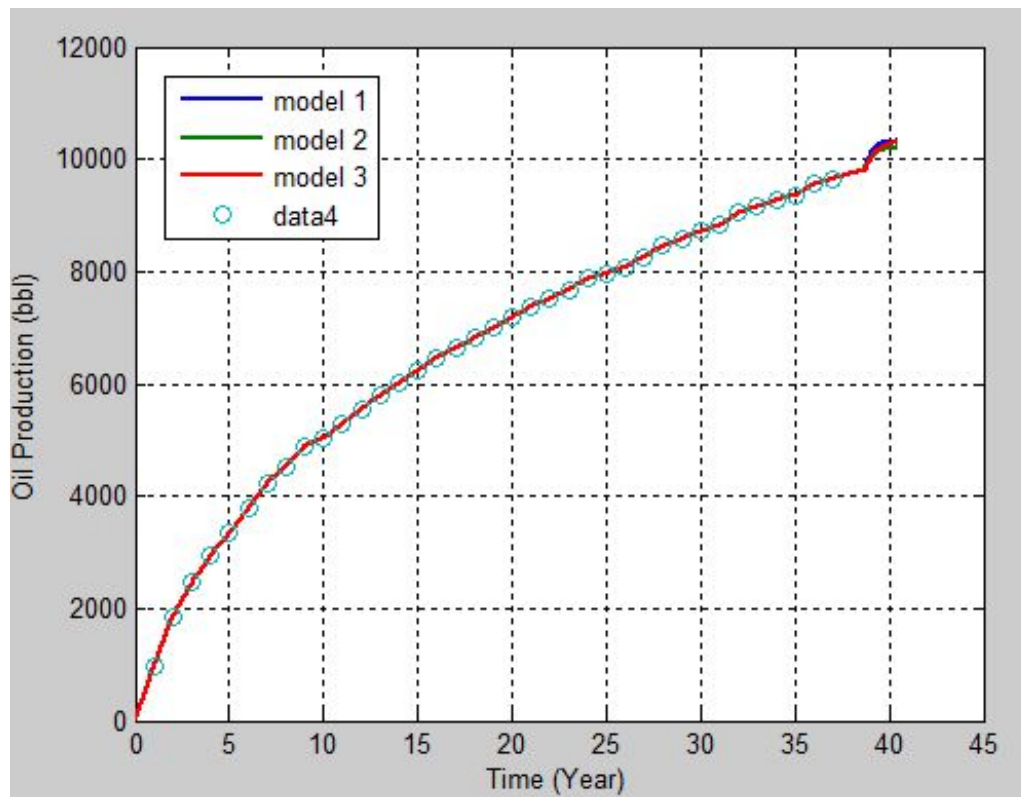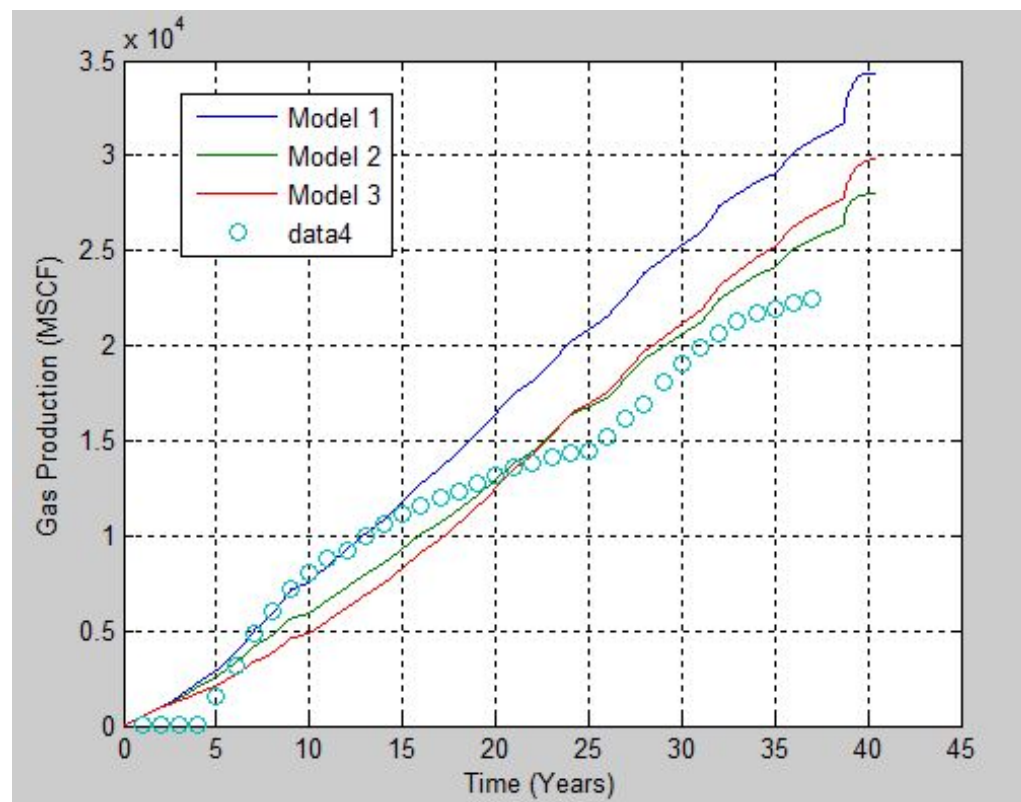



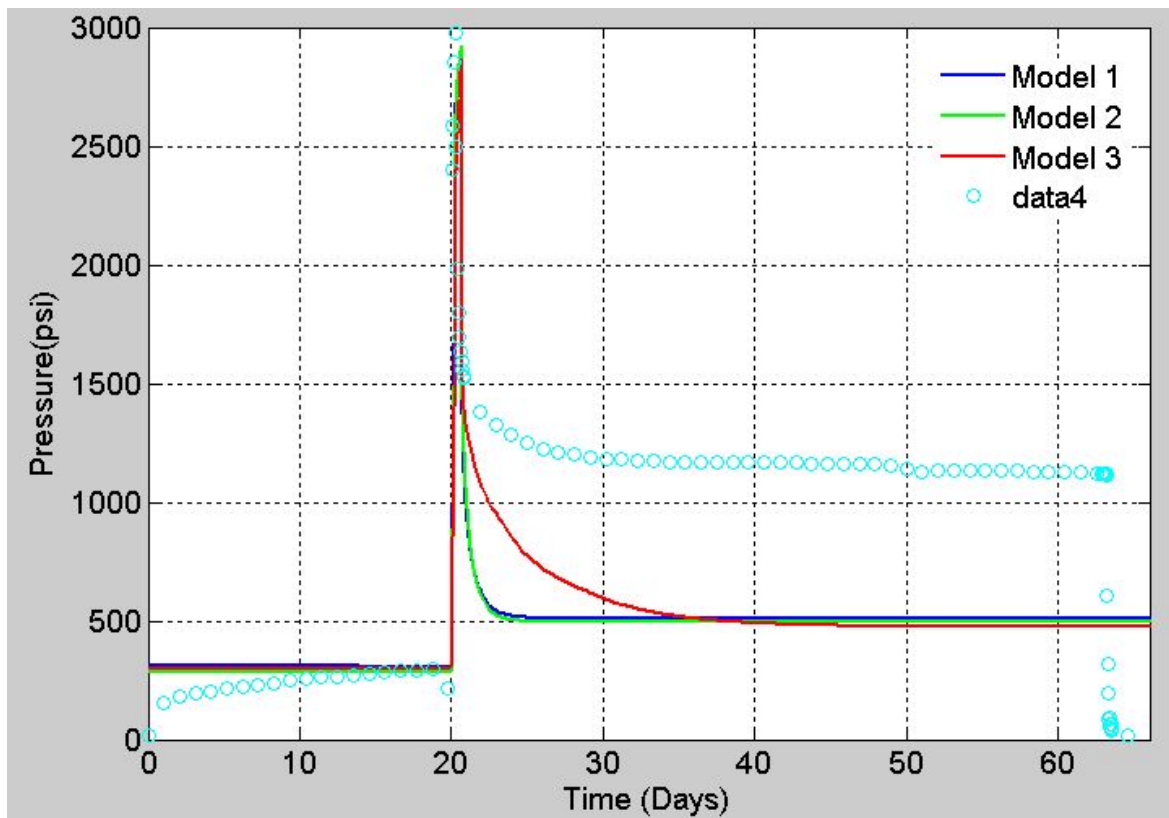

Figure B-2: Primary production and pressure response
